# Supplementary material for: Dolomite: a low cost thermochemical energy storage material
Source: Royal Society of Chemistry journal article supplement (doi:10.1039/c8ta07254j), 2018-12-13
Supplement: c8ta07254j1.pdf [file c8ta07254j1.pdf]

Electronic Supplemental Information for:

## Dolomite: A Low Cost Thermochemical Energy Storage Material

Terry D. Humphries,<sup>a</sup> Kasper T. Møller,<sup>a</sup> William D. A. Rickard,<sup>b</sup> M. Veronica Sofianos,<sup>a</sup> Shaomin Liu,<sup>c</sup>  
Craig E. Buckley,<sup>a</sup> Mark Paskevicius<sup>a\*</sup>

- Department of Physics and Astronomy, Fuels and Energy Technology Institute, Curtin University, GPO Box U1987, Perth, WA 6845, Australia
- John De Laeter Centre, Curtin University, GPO Box U1987, Perth, WA 6845, Australia
- Department of Chemical Engineering, Curtin University, Perth, 6102, Western Australia, Australia

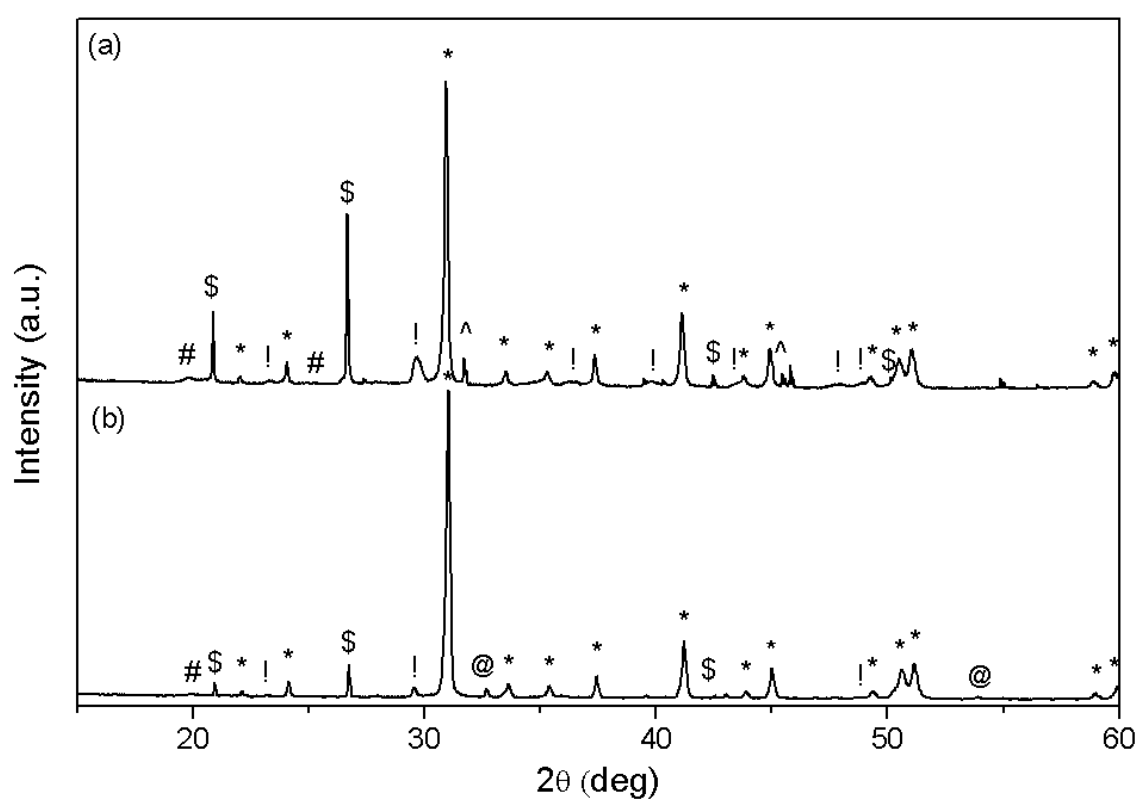

**Figure S1.** XRD analysis of (a) as supplied Richgro dolomite (Rich-A) and (b) Watheroo dolomite (Wath-A). \* = dolomite, ! = calcite, \$ = quartz, # = andradite, ^ = NaCl, @ = magnesite.  $\lambda = \text{CuK}\alpha_{1,2}$ .

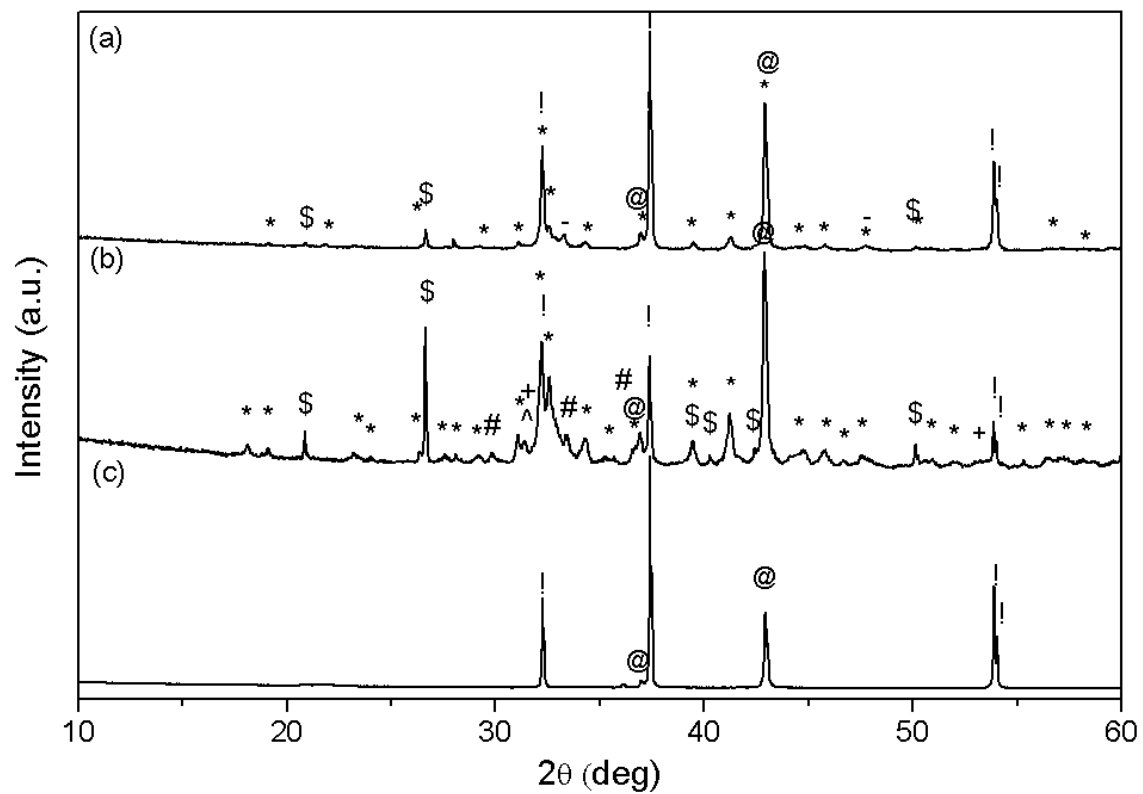

**Figure S2.** XRD analysis of thermally outgassed (a) Watheroo dolomite at 1000 °C (Wath-B), (b) Richgro dolomite at 1000 °C (Rich-B) and (c) synthetic dolomite at 650 °C (Synth-B). ! = CaO, @ = MgO, \$ = quartz, \* = larnite, - =  $\text{Ca}_9(\text{Al}_2\text{O}_6)_3$ , ^ = NaCl, # = andradite, + = gehlenite. Flowing Ar.  $\lambda = \text{CuK}\alpha_{1,2}$ .

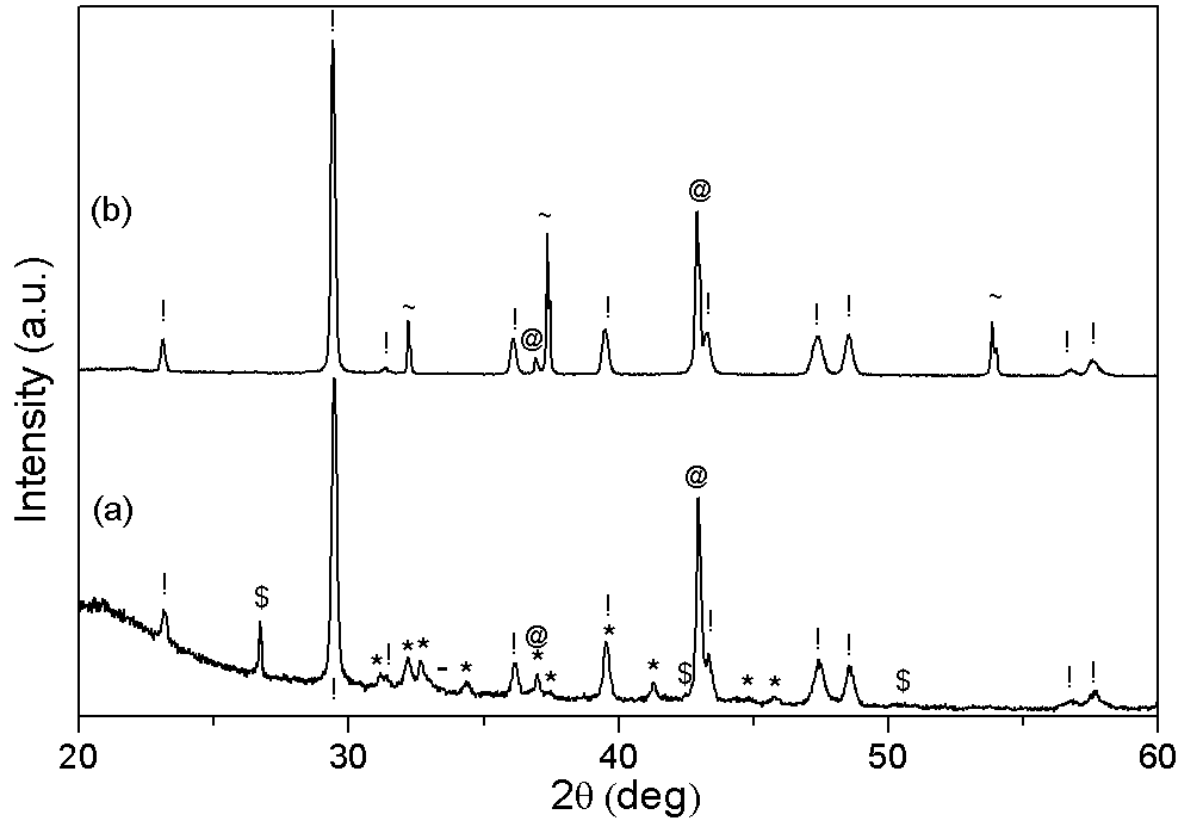

**Figure S3.** XRD analysis of carbonated (a) Watheroo dolomite (Wath-C) and (b) synthetic dolomite (Synth-C) reacted at 500 °C and 50 bar  $\text{CO}_2$ . ! = calcite, \$ = quartz, \* = larnite, @ = MgO, - =  $\text{Ca}_9(\text{Al}_2\text{O}_6)_3$ .  $\lambda = \text{CuK}\alpha_{1,2}$ .

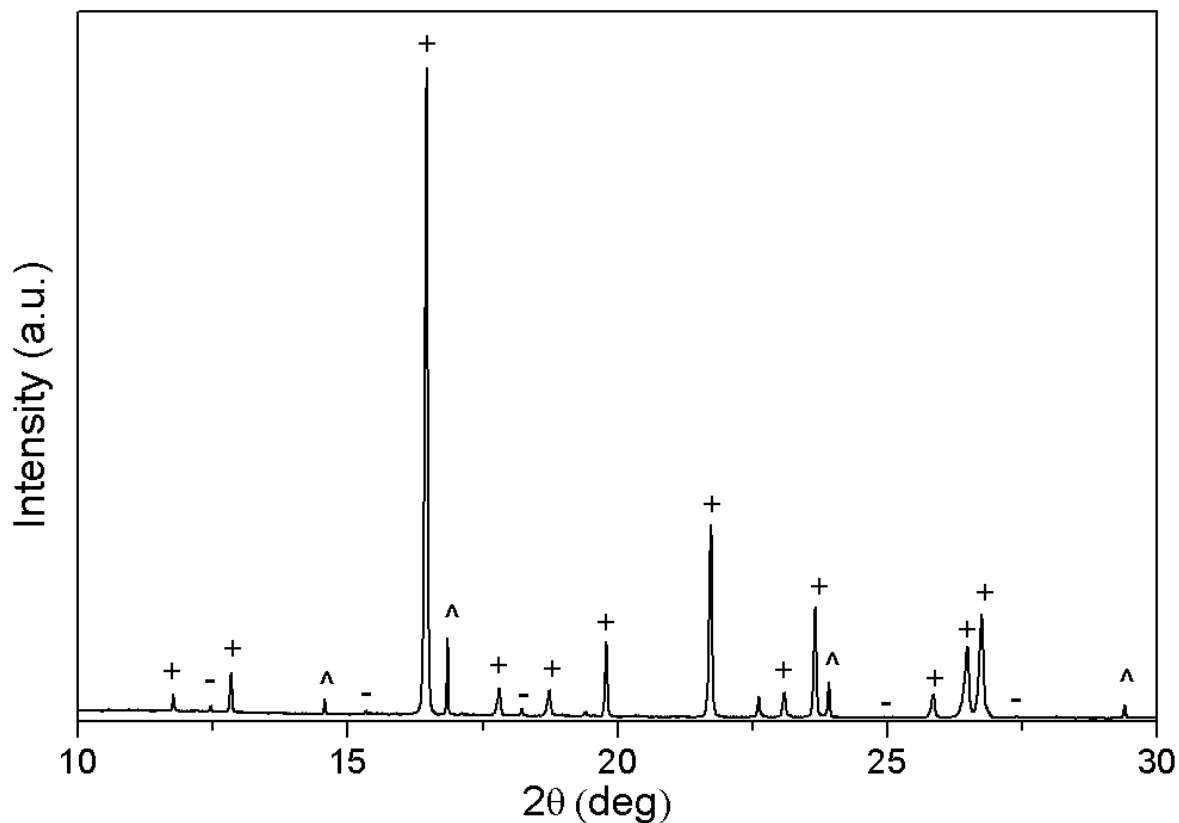

**Figure S4.** XRD analysis of carbonated synthetic dolomite and catalyst (Synth-C-cat) reacted at 500 °C and 50 bar CO<sub>2</sub>. + = Dolomite, ^ = NaCl, - = CaMg<sub>2</sub>Cl<sub>6</sub>(H<sub>2</sub>O)<sub>12</sub>. λ = 0.8263076 Å.

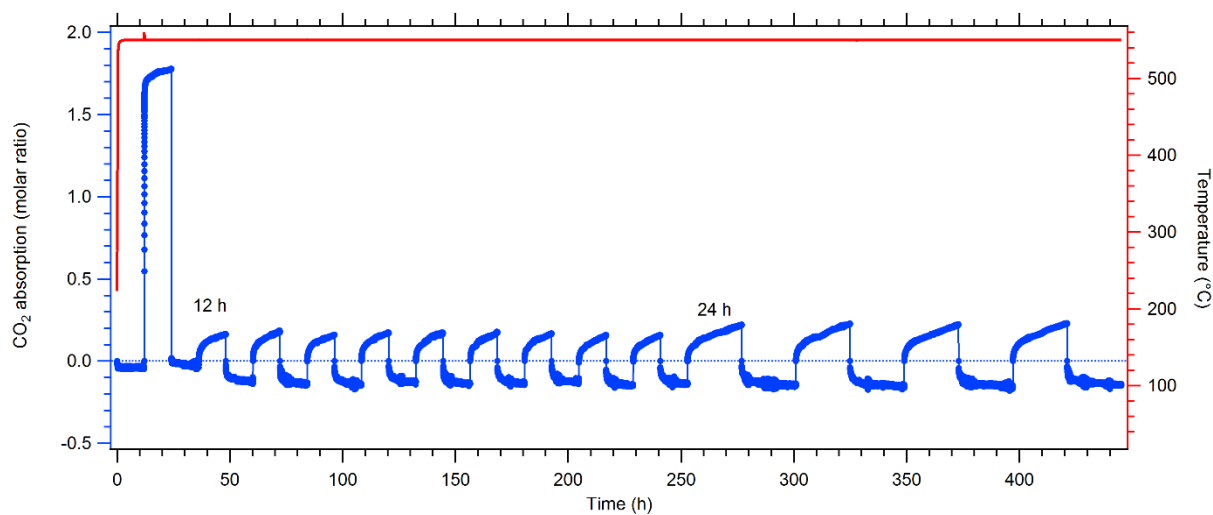

**Figure S5.** Carbon dioxide pressure cycling results for catalysed (NaCl:MgCl<sub>2</sub>) synthetic dolomite at 525 °C (Synth-D-cat, CO<sub>2</sub> absorption pressure 35 bar, desorption pressure 2 bar).

**Table S1.** Molar quantity of CO<sub>2</sub> absorbed and desorbed during Carbon dioxide pressure cycling for catalysed (NaCl:MgCl<sub>2</sub>) Watheroo dolomite (Wath-B-cat) and catalysed (NaCl:MgCl<sub>2</sub>) synthetic dolomite (Synth-D-cat). Uncertainties vary between absorption ( $\pm 0.01$  mol) and desorption ( $\pm 0.1$  mol) for the Wath-B-cat sample due to a larger reservoir volume being employed during the desorption measurement. Uncertainties for Synth-D-cat are  $\pm 0.01$  mol.

| Cycle           | Molar quantity of CO <sub>2</sub> |             |
|-----------------|-----------------------------------|-------------|
|                 | Wath-B-cat                        | Synth-D-cat |
| 1 - Absorption  | 1.09                              | 1.77        |
| - Desorption    | -0.3                              | -0.02       |
| 2 - Absorption  | 0.46                              | 0.16        |
| - Desorption    | -0.4                              | -0.12       |
| 3 - Absorption  | 0.47                              | 0.18        |
| - Desorption    | -0.5                              | -0.14       |
| 4 - Absorption  | 0.45                              | 0.16        |
| - Desorption    | -0.5                              | -0.14       |
| 5 - Absorption  | 0.43                              | 0.17        |
| - Desorption    | -0.5                              | -0.13       |
| 6 - Absorption  | 0.47                              | 0.17        |
| - Desorption    | -0.5                              | -0.14       |
| 7 - Absorption  | 0.45                              | 0.17        |
| - Desorption    | -0.5                              | -0.14       |
| 8 - Absorption  | 0.57                              | 0.16        |
| - Desorption    | -0.5                              | -0.13       |
| 9 - Absorption  | 0.54                              | 0.16        |
| - Desorption    | -0.5                              | -0.14       |
| 10 - Absorption | 0.60                              | 0.16        |
| - Desorption    | -0.5                              | -0.13       |
| 11 - Absorption | 0.55                              | 0.22        |
| - Desorption    | ---                               | -0.15       |
| 12 - Absorption | ---                               | 0.22        |
| - Desorption    | ---                               | -0.16       |
| 13 - Absorption | ---                               | 0.22        |
| - Desorption    | ---                               | -0.15       |
| 14 - Absorption | ---                               | 0.23        |
| - Desorption    | ---                               | -0.14       |

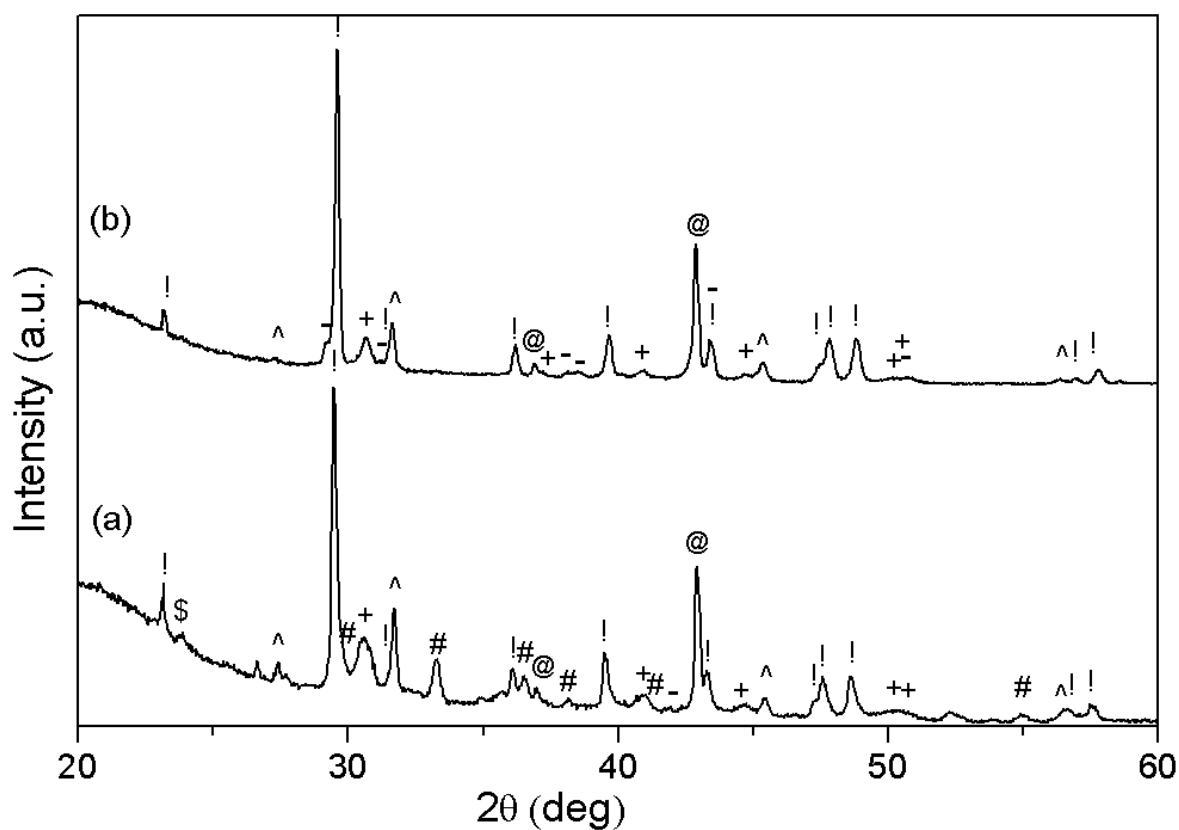

**Figure S6.** XRD analysis of cycled (a) Watheroo dolomite (Wath-D-cat) and (b) synthetic dolomite (Synth-D-cat) measured after absorption of CO<sub>2</sub>. + = Dolomite, ! = calcite, @ = MgO, ^ = NaCl, \$ = quartz, # = andradite, - = CaCl<sub>2</sub>.  $\lambda$  = CuK $\alpha_{1,2}$ . CO<sub>2</sub> absorption pressure 35 bar, desorption pressure 2 bar.

**Table S2.** Brunauer–Emmett–Teller (BET) surface area, cumulative pore volume and average pore size of the synthetic and mined dolomite samples from the Barrett–Joyner–Halenda (BJH) method.

| Sample name                                         | BET surface area (m <sup>2</sup> /g) | BJH adsorption cumulative volume of pores (cm <sup>3</sup> /g) | BJH adsorption average pore width (nm) |
|-----------------------------------------------------|--------------------------------------|----------------------------------------------------------------|----------------------------------------|
| <b>Rich-A</b><br>Richgro dolomite                   | 16.90 ± 0.16                         | 0.0155                                                         | 4.5                                    |
| <b>Wath-A</b><br>Watheroo dolomite                  | 16.78 ± 0.16                         | 0.0146                                                         | 4.6                                    |
| <b>Synth-B</b><br>Synthetic CaO/MgO                 | 0.98 ± 0.01                          | 0.0014                                                         | 7.5                                    |
| <b>Rich-B</b><br>Calcined Richgro<br>(from Rich-A)  | 4.95 ± 0.03                          | 0.0047                                                         | 4.7                                    |
| <b>Wath-B</b><br>Calcined Watheroo<br>(from Wath-A) | 6.19 ± 0.02                          | 0.0061                                                         | 4.7                                    |
